# Supplementary material for: Non-redox metal ions can promote Wacker-type oxidations even better than copper(ii): a new opportunity in catalyst design
Source: Royal Society of Chemistry journal article supplement (doi:10.1039/c5dt02612a), 2015-01-01
Supplement: c5dt02612a1.pdf [file c5dt02612a1.pdf]

### Electronic Supplementary Information for

## Non-redox metal ions can promote Wacker-type oxidations even better than copper(II): a new opportunity in catalyst design

*Shuhao Qin<sup>†</sup>, Lei Dong<sup>†</sup>, Zhuqi Chen, Sicheng Zhang, Guochuan Yin\**

School of Chemistry and Chemical Engineering, Key Laboratory for Large-Format Battery Materials and System, Ministry of Education, Huazhong University of Science and Technology, Wuhan 430074, PR China.

<sup>†</sup>These authors equally contribute to this work. Correspondence to: gyin@hust.edu.cn

### Contents

**Figure S1.** The UV-Vis spectra of Pd(OAc)<sub>2</sub>/Sc(OTf)<sub>3</sub> in acetonitrile under different concentrations.

**Figure S2.** <sup>1</sup>H-<sup>13</sup>C HSQC spectra of Pd(OAc)<sub>2</sub> plus Sc(OTf)<sub>3</sub> in CD<sub>3</sub>CN

**Figure S3.** UV- visible spectra of Pd(OAc)<sub>2</sub> with different amount of Sc(OTf)<sub>3</sub>.

**Figure S4.** <sup>1</sup>H NMR spectra of Pd(OAc)<sub>2</sub> with different amount of Sc(OTf)<sub>3</sub>.

**Figure S5.** The UV- visible spectra of Pd(OAc)<sub>2</sub>/Al(OTf)<sub>3</sub> in acetonitrile.

**Figure S6** The UV- visible spectra of Pd(OAc)<sub>2</sub>/Cu(OTf)<sub>2</sub> in acetonitrile.

**Figure S7-1-5** The <sup>1</sup>H NMR kinetics of olefinic bond in 1-hexene isomerization.

**Figure S8-1-5** The <sup>1</sup>H NMR kinetics of olefinic bond in 1-octene isomerization.

**Figure S9-1-5** The <sup>1</sup>H NMR kinetics of olefinic bond in 1-dodecene isomerization.

**Figure S10** Isomerization kinetics of 1,5-cyclooctadiene.

**Figure S11-1-3.** GC-MS graph of 1-octene oxidation by Pd(OAc)<sub>2</sub> plus Sc(OTf)<sub>3</sub>.

**Figure S12-1-3.** GC-MS graph of 1,5-cyclooctadiene isomerization by Pd(OAc)<sub>2</sub> plus Sc(OTf)<sub>3</sub>.

**Table S1** Optimization of Pd(II)-catalyzed 1-hexene oxidation under different solvent conditions<sup>[a]</sup>

**Table S2** The influence of water content on Pd(II)/Sc(III)-catalyzed 1-hexene oxidation<sup>a</sup>

**Table S3** The influence of Pd(II)/Sc(III) ratio on 1-hexene oxidation<sup>[a]</sup>

**Table S4** Lewis acid promoted Pd(II)-catalyzed 1-hexene isomerization under different conditions<sup>[a]</sup>

**Table S5** Lewis acid promoted Pd(II)-catalyzed 1-octene isomerization under different conditions.

**Table S6** Lewis acid promoted Pd(II)-catalyzed 1-dodecene isomerization under different conditions.

**Table S7** Lewis acid promoted Pd(II)-catalyzed 1,5-cyclooctadiene isomerization under different conditions.

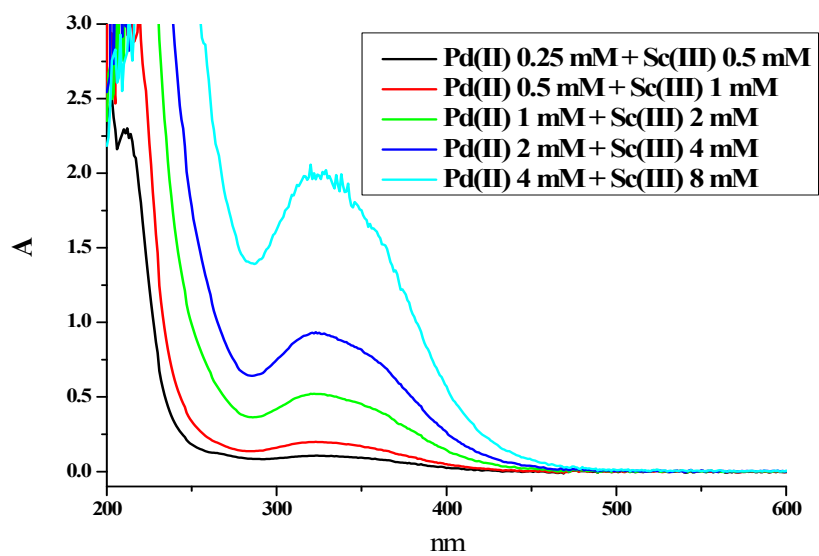

**Figure S1.** The UV- visible spectra of Pd(OAc)<sub>2</sub>/Sc(OTf)<sub>3</sub> in acetonitrile under different concentrations.

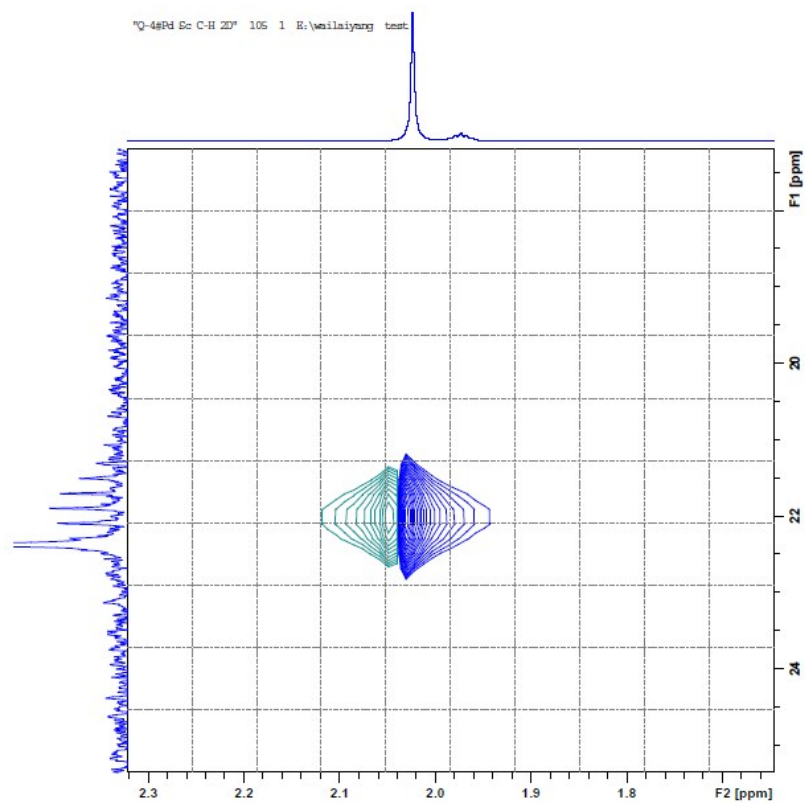

**Figure S2.**  $^1\text{H}$ - $^{13}\text{C}$  HSQC spectrum of  $\text{Pd}(\text{OAc})_2$  plus  $\text{Sc}(\text{OTf})_3$  in  $\text{CD}_3\text{CN}$ .

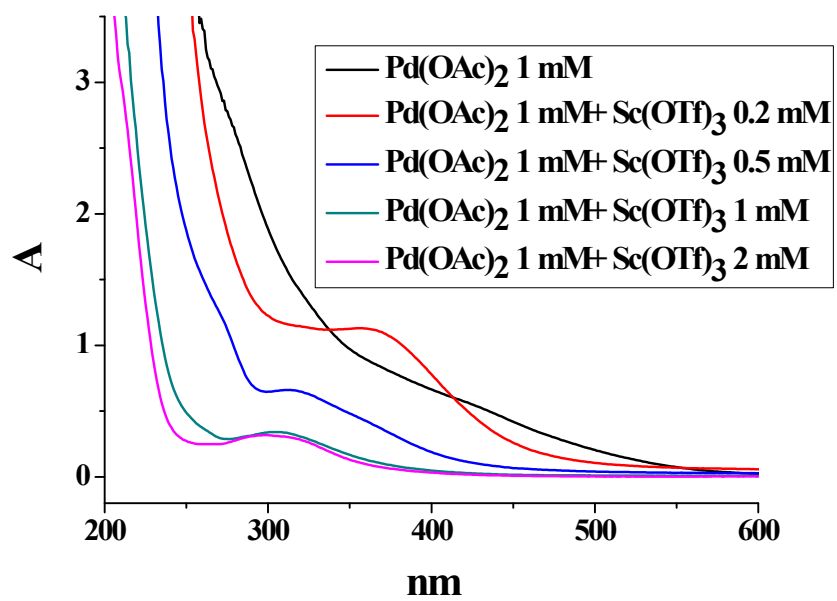

**Figure S3.** UV- visible spectra of Pd(OAc)<sub>2</sub> with different amount of Sc(OTf)<sub>3</sub>.

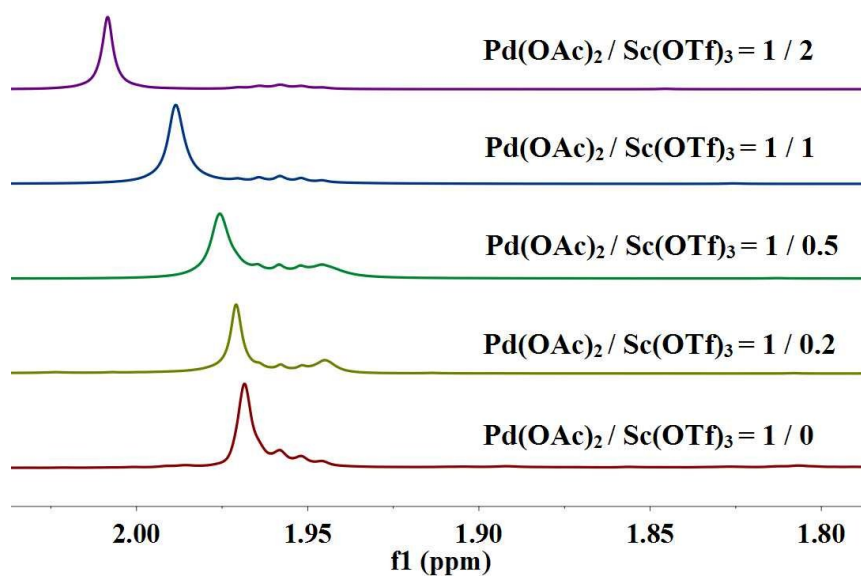

**Figure S4.** <sup>1</sup>H NMR spectra of Pd(OAc)<sub>2</sub> with different amount of Sc(OTf)<sub>3</sub>.

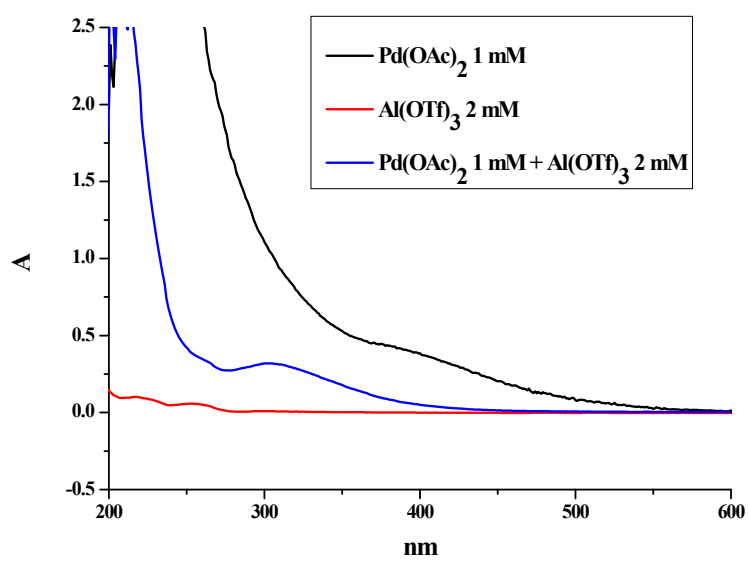

**Figure S5.** The UV- visible spectra of Pd(OAc)<sub>2</sub>/Al(OTf)<sub>3</sub> in acetonitrile.

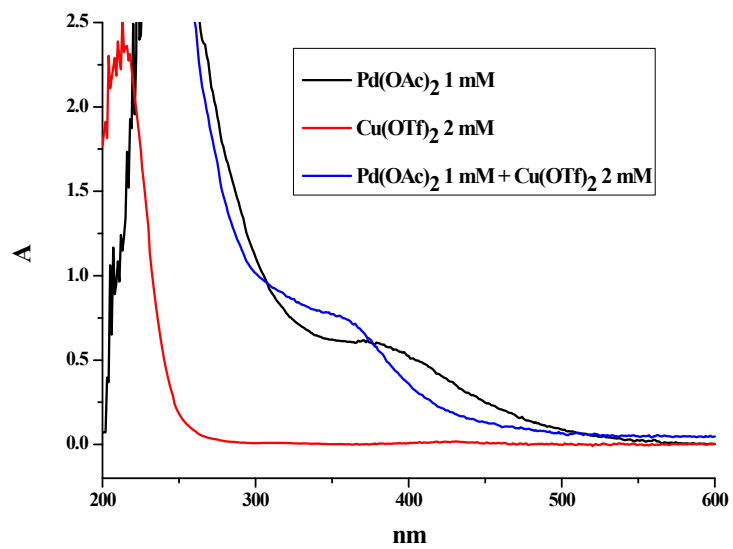

**Figure S6** The UV- visible spectra of Pd(OAc)<sub>2</sub>/Cu(OTf)<sub>2</sub> in acetonitrile.

**Table S1** Optimization of Pd(II)-catalyzed 1-hexene oxidation under different solvent conditions<sup>[a]</sup>

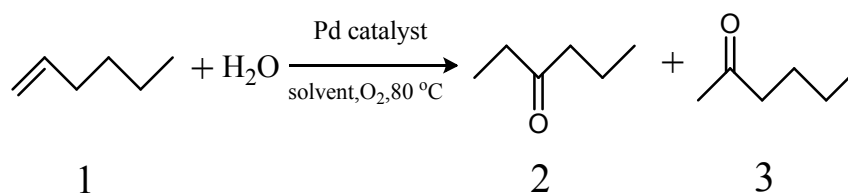

| Entries                | Catalyst                   | Additives                   | Solvent                                 | Conv. [%]     | Yield of 2 [%] | Yield of 3 [%] |
|------------------------|----------------------------|-----------------------------|-----------------------------------------|---------------|----------------|----------------|
| 1                      | Pd(OAc) <sub>2</sub>       | Sc (OTf) <sub>3</sub>       | DMF                                     | 28.3          | trace          | 6.9            |
| 2                      | Pd(OAc) <sub>2</sub>       | Sc (OTf) <sub>3</sub>       | DMSO                                    | 23.0          | trace          | 4.5            |
| 3                      | Pd(OAc) <sub>2</sub>       | Cu (OTf) <sub>2</sub>       | DMSO                                    | 21.9          | trace          | 4.3            |
| 4                      | Pd(OAc) <sub>2</sub>       | Sc (OTf) <sub>3</sub>       | DMA                                     | 21.8          | trace          | 11.8           |
| <b>5<sup>[b]</sup></b> | <b>Pd(OAc)<sub>2</sub></b> | <b>Sc (OTf)<sub>3</sub></b> | <b>CH<sub>3</sub>CN</b>                 | <b>&gt;99</b> | <b>29.3</b>    | <b>53.1</b>    |
| 6 <sup>[b]</sup>       | PdCl <sub>2</sub>          | Sc (OTf) <sub>3</sub>       | CH <sub>3</sub> CN                      | 19.7          | trace          | 3.9            |
| 7 <sup>[b]</sup>       | Pd(OAc) <sub>2</sub>       | Sc (OTf) <sub>3</sub>       | 5 mL CH <sub>3</sub> CN+<br>0.2 mL DMSO | 23.6          | 2.9            | 11.8           |
| 8 <sup>[b]</sup>       | Pd(OAc) <sub>2</sub>       | Sc (OTf) <sub>3</sub>       | 5 mL CH <sub>3</sub> CN+<br>0.2 mL DMF  | 35.1          | 7.1            | 13.7           |
| 9 <sup>[b]</sup>       | Pd(OAc) <sub>2</sub>       | Sc (OTf) <sub>3</sub>       | 5 mL CH <sub>3</sub> CN+<br>0.2 mL DMA  | 29.4          | 3.2            | 9.9            |

[a] Reaction conditions: solvent (5 mL), H<sub>2</sub>O (0.2 mL), 1-hexene (2 mmol), Pd(II) catalyst (0.02 mmol), Sc(OTf)<sub>3</sub> (0.04 mmol), O<sub>2</sub> (20 atm), 80 °C, 16 h.

[b] Reaction conditions: solvent (5 mL), H<sub>2</sub>O (0.2 mL), 1-hexene (2 mmol), Pd(II) catalyst (0.02 mmol), Sc(OTf)<sub>3</sub> (0.04 mmol), O<sub>2</sub> (20 atm), 80 °C, 2 h.



**Table S2** The influence of water content on Pd(II)/Sc(III)-catalyzed 1-hexene oxidation<sup>a</sup>

| Entries | H <sub>2</sub> O (mL) | Conv. [%] | Yield of 2 [%] | Yield of 3 [%] |
|---------|-----------------------|-----------|----------------|----------------|
| 1       | -                     | 15.1      | trace          | 1.4            |
| 2       | 0.05                  | 31.1      | 2.1            | 8.3            |
| 3       | 0.1                   | 83.3      | 21.7           | 41.2           |
| 4       | 0.2                   | 84.1      | 24.3           | 43.2           |
| 5       | 0.3                   | 64.0      | 13.4           | 27.5           |
| 6       | 0.4                   | 62.2      | 14.9           | 31.1           |

[a] Reaction conditions: CH<sub>3</sub>CN (5 mL), 1-hexene (2 mmol), Pd(OAc)<sub>2</sub> (0.02 mmol), Sc(OTf)<sub>3</sub> (0.04 mmol), O<sub>2</sub> (20 atm), 60 °C, 5 h.

**Table S3** The influence of Pd(II)/Sc(III) ratio on 1-hexene oxidation<sup>[a]</sup>

| Entries | Sc(OTf) <sub>3</sub><br>(equiv) | Conv. (%) | Yield of 2<br>(%) | Yield of 3<br>(%) | Pd(0) black<br>formation |
|---------|---------------------------------|-----------|-------------------|-------------------|--------------------------|
| 1       | -                               | 13.7      | trace             | 1.3               | a lot                    |
| 2       | 0.5                             | 25.7      | 2.0               | 8.1               | some                     |
| 3       | 1                               | 53.7      | 10.1              | 23.2              | minor                    |
| 4       | 2                               | 78.1      | 20.7              | 40.9              | none                     |
| 5       | 3                               | 98.2      | 28.8              | 53.3              | none                     |
| 6       | 4                               | 99.3      | 29.1              | 54.2              | none                     |

[a] Reaction conditions: CH<sub>3</sub>CN (5 mL), H<sub>2</sub>O (0.2 mL), 1-hexene (2 mmol), Pd(OAc)<sub>2</sub> (0.02 mmol), O<sub>2</sub> (20 atm), 60 °C, 2 h.

**Table S4** Lewis acid promoted Pd(II)-catalyzed 1-hexene isomerization under different conditions<sup>[a]</sup>

| Entries | Catalyst             | Lewis acid           | Time  | Conv./% | Internal olefin yield /% |
|---------|----------------------|----------------------|-------|---------|--------------------------|
| 1       | Pd(OAc) <sub>2</sub> | -                    | 1 h   | -       | -                        |
| 2       | -                    | Cu(OTf) <sub>2</sub> | 1 h   | -       | -                        |
| 3       | -                    | Sc(OTf) <sub>3</sub> | 1 h   | -       | -                        |
| 4       | Pd(OAc) <sub>2</sub> | Sc(OTf) <sub>3</sub> | 6 min | 98.2    | 89.5                     |
| 5       | Pd(OAc) <sub>2</sub> | Cu(OTf) <sub>2</sub> | 6 min | 55.8    | 49.3                     |

[a] Reaction conditions: CD<sub>3</sub>CN (0.5 mL), Pd(OAc)<sub>2</sub> (4 mM), Lewis acid (8 mM), 1-hexene (40 mM), reaction performed in NMR tube at 25 °C.

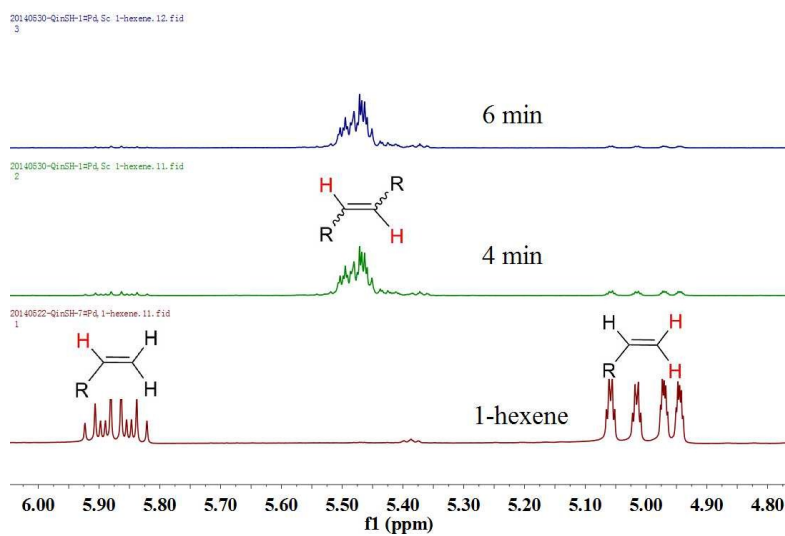

**Figure S7-1** The <sup>1</sup>H NMR kinetics of olefinic bond in 1-hexene isomerization at 25 °C (0.5 mL of acetonitrile-d<sub>3</sub> containing 4 mM Pd(OAc)<sub>2</sub>, 8 mM Sc(OTf)<sub>3</sub> and 40 mM 1-hexene).

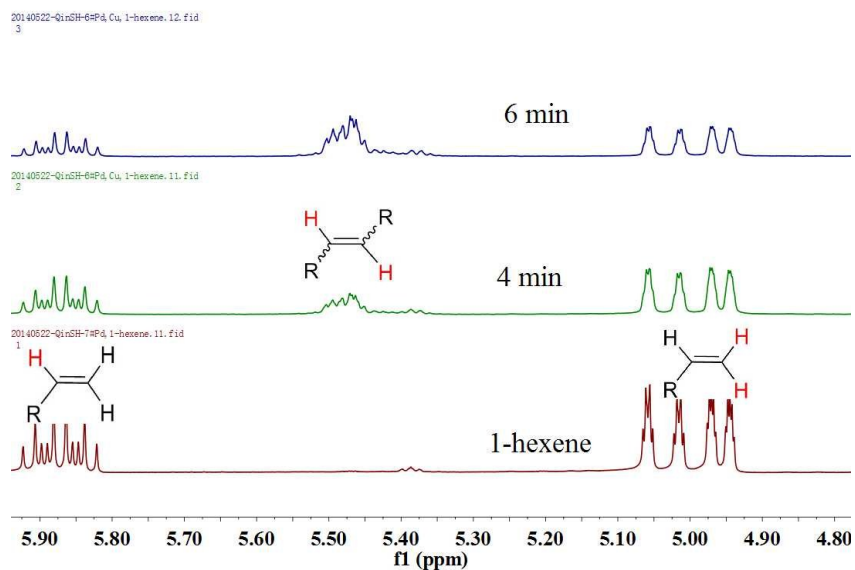

**Figure S7-2** The  $^1\text{H}$  NMR kinetics of olefinic bond in 1-hexene isomerization 25 °C (0.5 mL of acetonitrile- $d_3$  containing 4 mM  $\text{Pd}(\text{OAc})_2$ , 8 mM  $\text{Cu}(\text{OTf})_2$  and 40 mM 1-hexene).

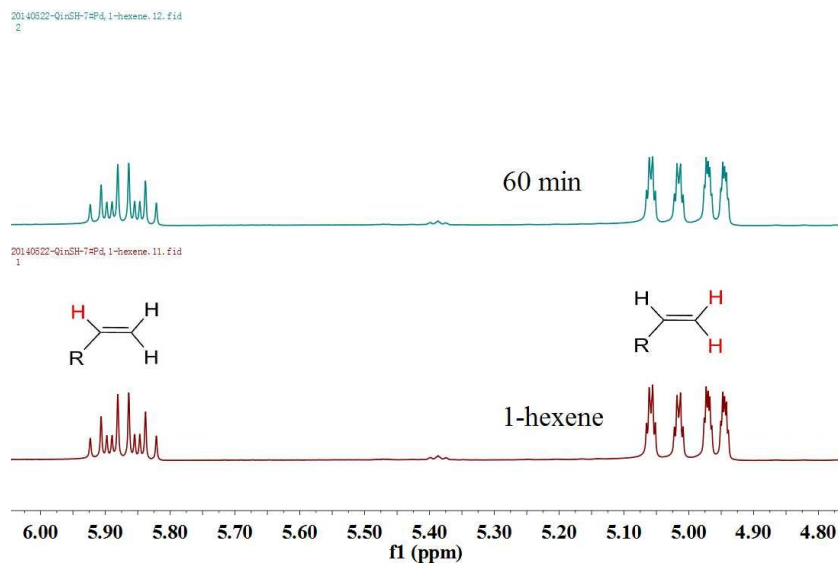

**Figure S7-3** The  $^1\text{H}$  NMR kinetics of olefinic bond in 1-hexene isomerization 25 °C (0.5 mL of acetonitrile- $d_3$  containing 4 mM  $\text{Pd}(\text{OAc})_2$  and 40 mM 1-hexene).

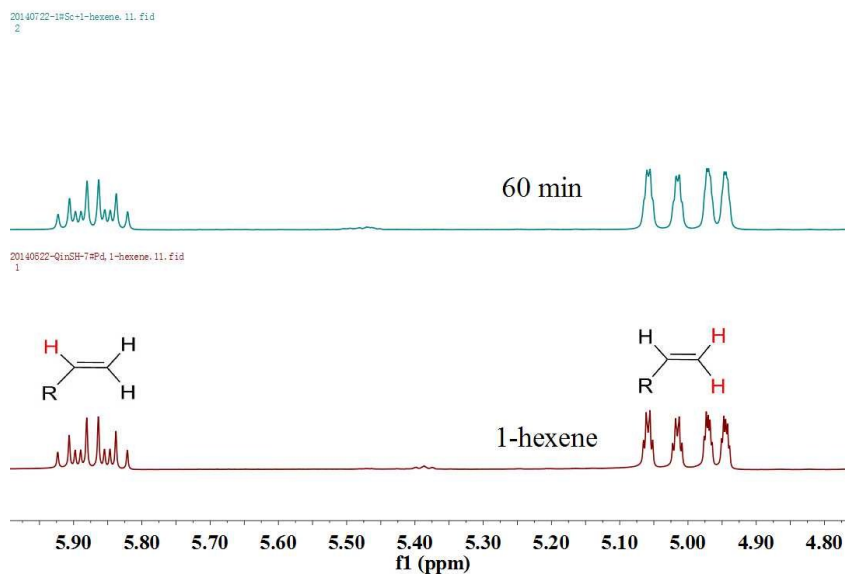

**Figure S7-4** The  $^1\text{H}$  NMR kinetics of olefinic bond in 1-hexene isomerization 25 °C (0.5 mL of acetonitrile- $\text{d}_3$  containing 8 mM  $\text{Sc}(\text{OTf})_3$  and 40 mM 1-hexene).

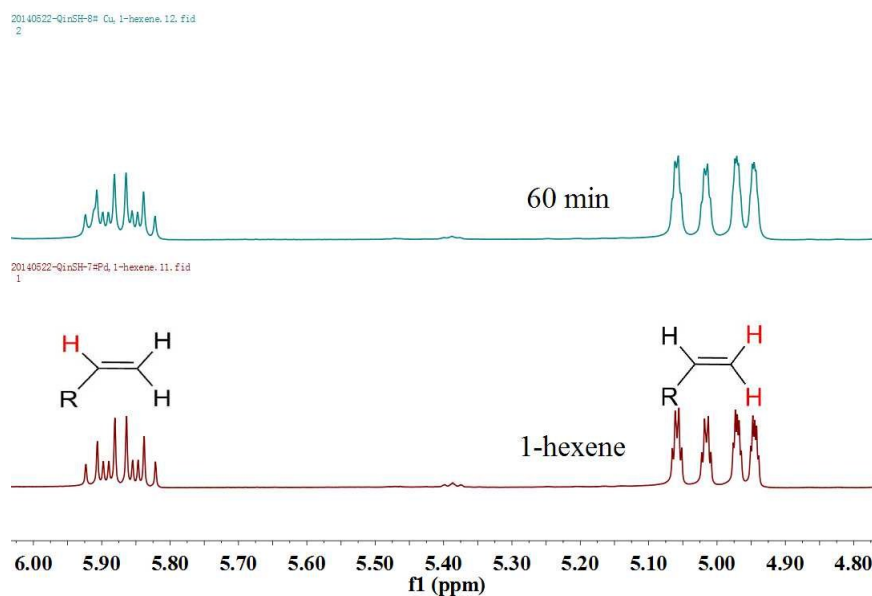

**Figure S7-5** The  $^1\text{H}$  NMR kinetics of olefinic bond in 1-hexene isomerization 25 °C (0.5 mL of acetonitrile- $\text{d}_3$  containing 8 mM  $\text{Cu}(\text{OTf})_2$  and 40 mM 1-hexene).

**Table S5** Lewis acid promoted Pd(II)-catalyzed 1-octene isomerization under different conditions<sup>[a]</sup>

| Entries | Catalyst             | Lewis acid           | Time  | Conv./% | Internal olefin yield /% |
|---------|----------------------|----------------------|-------|---------|--------------------------|
| 1       | Pd(OAc) <sub>2</sub> | -                    | 1 h   | -       | -                        |
| 2       | -                    | Cu(OTf) <sub>2</sub> | 1 h   | -       | -                        |
| 3       | -                    | Sc(OTf) <sub>3</sub> | 1 h   | -       | -                        |
| 4       | Pd(OAc) <sub>2</sub> | Sc(OTf) <sub>3</sub> | 4 min | 94.5    | 90.3                     |
| 5       | Pd(OAc) <sub>2</sub> | Cu(OTf) <sub>2</sub> | 6 min | 75.7    | 63.2                     |

[a] Reaction conditions: CD<sub>3</sub>CN (0.5 mL), Pd(OAc)<sub>2</sub> catalyst (4 mM), Lewis acid (8 mM), 1-octene (40 mM), reaction performed in NMR tube at 25 °C.

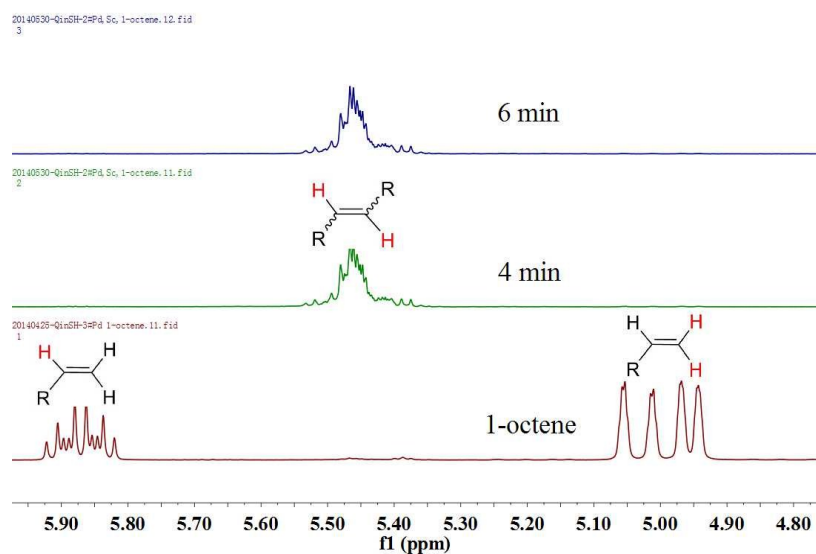

**Figure S8-1** The <sup>1</sup>H NMR kinetics of olefinic bond in 1-octene isomerization 25 °C (0.5 mL of acetonitrile-d<sub>3</sub> containing 4 mM Pd(OAc)<sub>2</sub>, 8 mM Sc(OTf)<sub>3</sub> and 40 mM 1-octene).

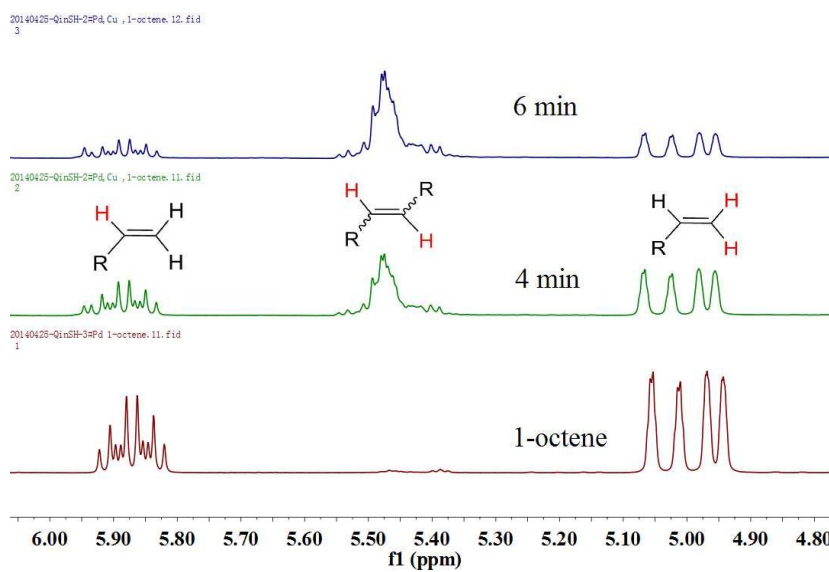

**Figure S8-2** The  $^1\text{H}$  NMR kinetics of olefinic bond in 1-octene isomerization 25 °C (0.5 mL of acetonitrile- $\text{d}_3$  containing 4 mM  $\text{Pd}(\text{OAc})_2$ , 8 mM  $\text{Cu}(\text{OTf})_2$  and 40 mM 1-octene).

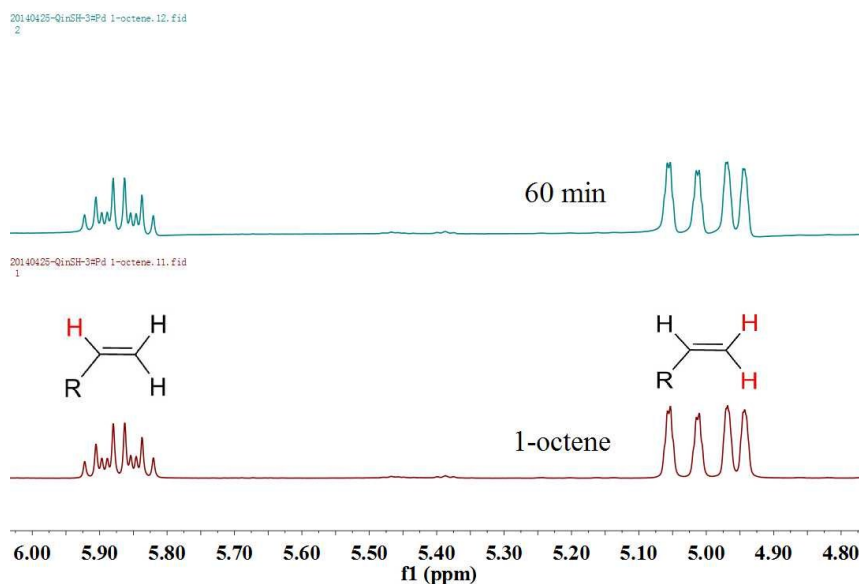

**Figure S8-3** The  $^1\text{H}$  NMR kinetics of olefinic bond in 1-octene isomerization 25 °C (0.5 mL of acetonitrile- $\text{d}_3$  containing 4 mM  $\text{Pd}(\text{OAc})_2$  and 40 mM 1-octene).

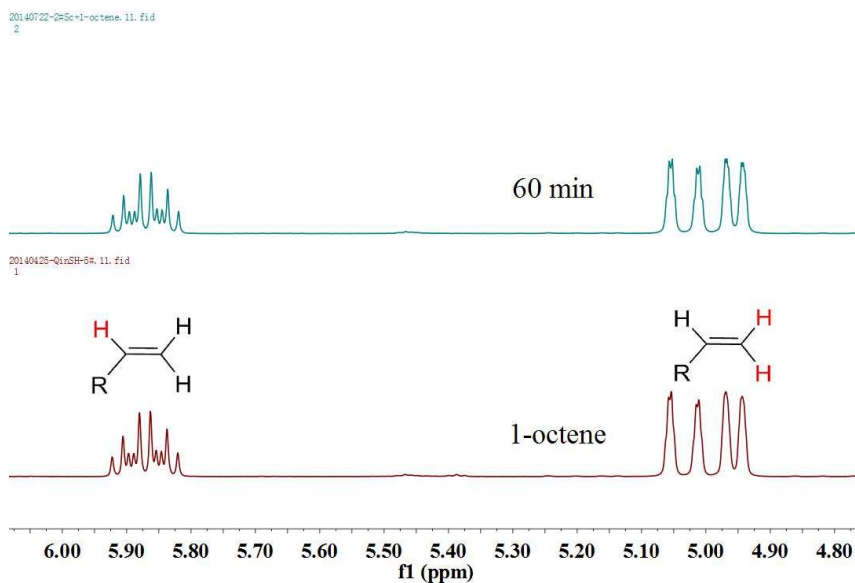

**Figure S8-4** The  $^1\text{H}$  NMR kinetics of olefinic bond in 1-octene isomerization 25 °C (0.5 mL of acetonitrile- $\text{d}_3$  containing 8 mM  $\text{Sc}(\text{OTf})_3$  and 40 mM 1-octene).

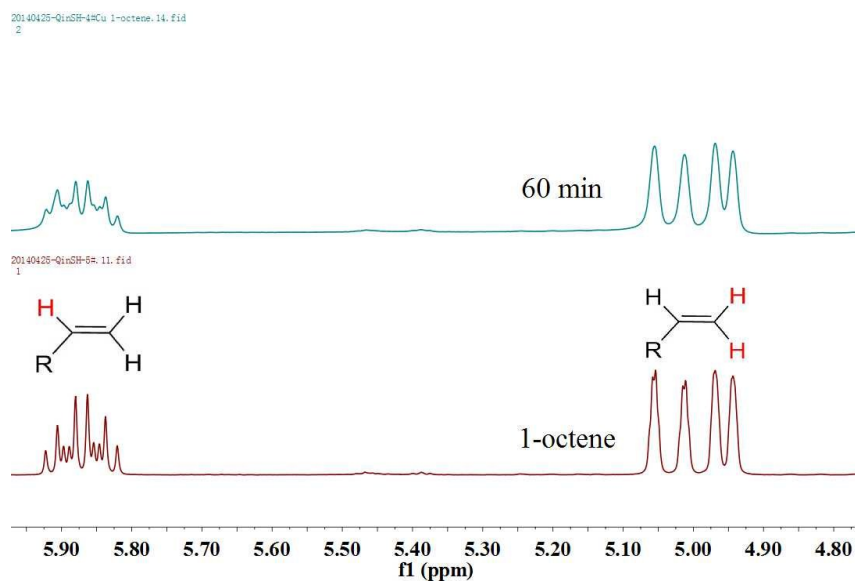

**Figure S8-5** The  $^1\text{H}$  NMR kinetics of olefinic bond in 1-octene isomerization 25 °C (0.5 mL of acetonitrile- $\text{d}_3$  containing 8 mM  $\text{Cu}(\text{OTf})_2$  and 40 mM 1-octene).



**Table S6** Lewis acid promoted Pd(II)-catalyzed 1-dodecene isomerization under different conditions<sup>[a]</sup>

| Entries | Catalyst             | Lewis acid           | Time  | Conv./% | Internal olefin yield /% |
|---------|----------------------|----------------------|-------|---------|--------------------------|
| 1       | Pd(OAc) <sub>2</sub> | -                    | 1 h   | -       | -                        |
| 2       | -                    | Cu(OTf) <sub>2</sub> | 1 h   | -       | -                        |
| 3       | -                    | Sc(OTf) <sub>3</sub> | 1 h   | -       | -                        |
| 4       | Pd(OAc) <sub>2</sub> | Sc(OTf) <sub>3</sub> | 6 min | 99.6    | 84.4                     |
| 5       | Pd(OAc) <sub>2</sub> | Cu(OTf) <sub>2</sub> | 6 min | 48.4    | 41.4                     |

[a] Reaction conditions: CD<sub>3</sub>CN (0.5 mL), Pd(OAc)<sub>2</sub> (4 mM), Lewis acid (8 mM), 1-dodecene (40 mM), reaction performed in NMR tube at 25 °C.

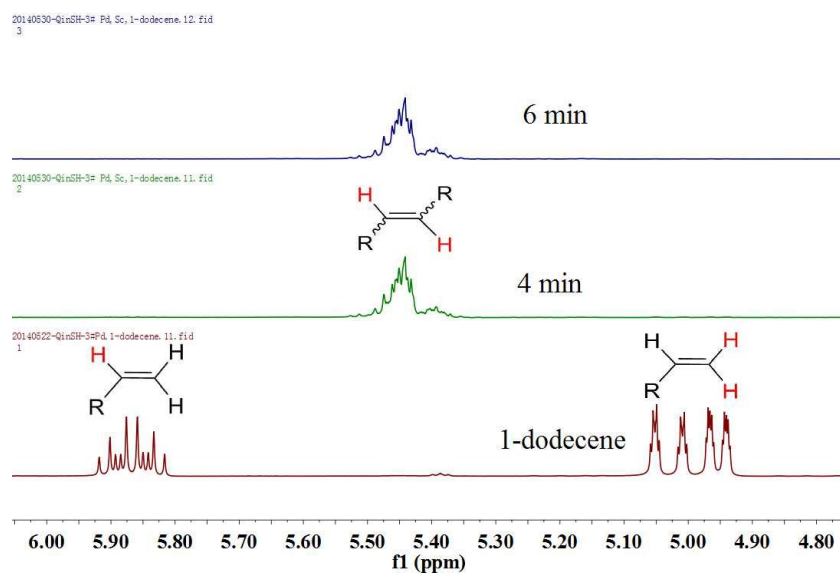

**Figure S9-1** The <sup>1</sup>H NMR kinetics of olefinic bond in 1-dodecene isomerization 25 °C (0.5 mL of acetonitrile-d<sub>3</sub> containing 4 mM Pd(OAc)<sub>2</sub>, 8 mM Sc(OTf)<sub>3</sub> and 40 mM 1-dodecene).

20140822-QinSH-2#Pd, Cu, 1-dodecene.13.fid  
3

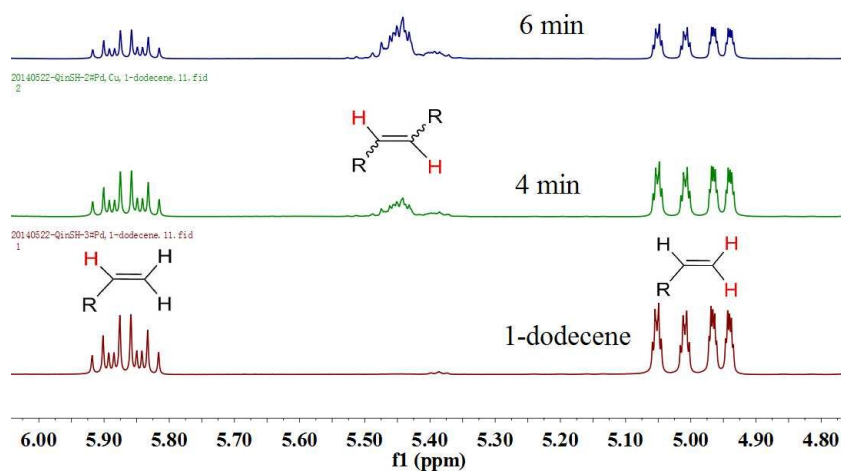

**Figure S9-2** The <sup>1</sup>H NMR kinetics of olefinic bond in 1-dodecene isomerization 25 °C (0.5 mL of acetonitrile-<sup>d</sup><sub>3</sub> containing 4 mM Pd(OAc)<sub>2</sub>, 8 mM Cu(OTf)<sub>2</sub> and 40 mM 1-dodecene).

20140822-QinSH-3#Pd, 1-dodecene.12.fid  
2

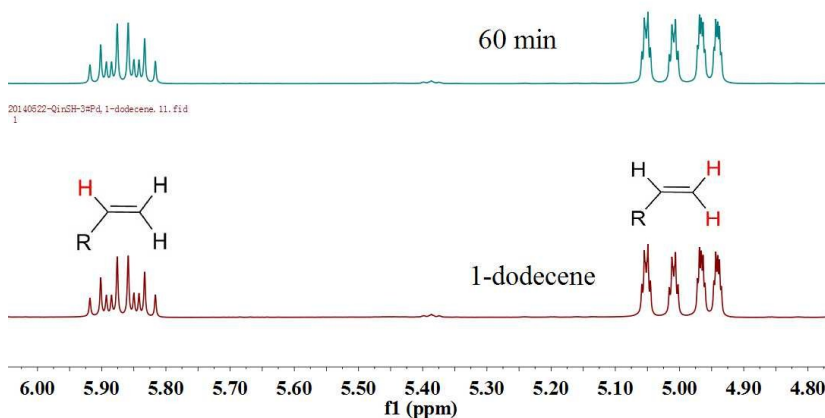

**Figure S9-3** The <sup>1</sup>H NMR kinetics of olefinic bond in 1-dodecene isomerization 25 °C (0.5 mL of acetonitrile-<sup>d</sup><sub>3</sub> containing 4 mM Pd(OAc)<sub>2</sub> and 40 mM 1-dodecene).

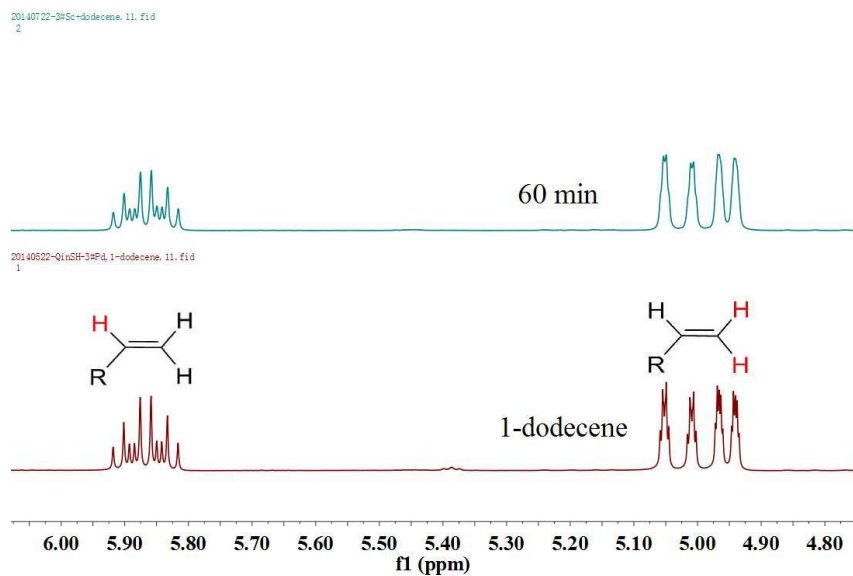

**Figure S9-4** The  $^1\text{H}$  NMR kinetics of olefinic bond in 1-dodecene isomerization 25 °C (0.5 mL of acetonitrile- $\text{d}_3$  containing 8 mM  $\text{Sc}(\text{OTf})_3$  and 40 mM 1-dodecene).

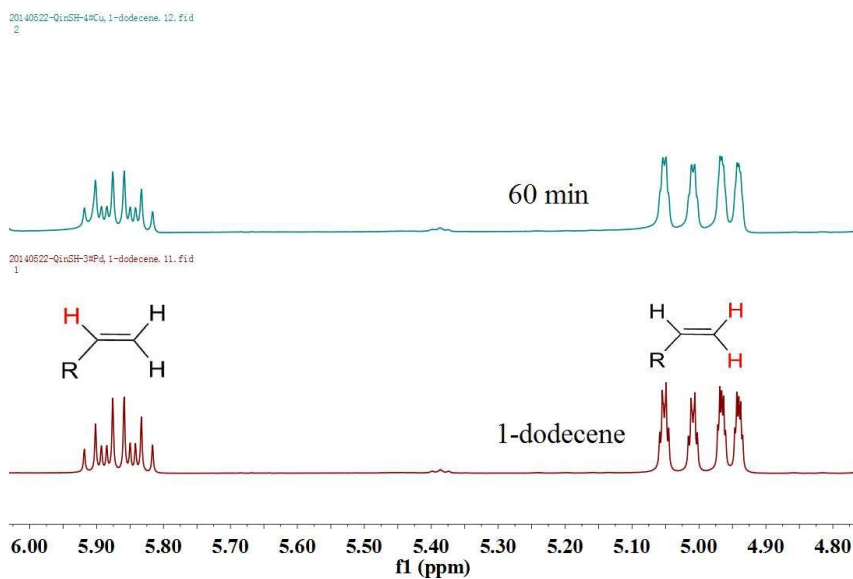

**Figure S9-5** The  $^1\text{H}$  NMR kinetics of olefinic bond in 1-dodecene isomerization 25 °C (0.5 mL of acetonitrile- $\text{d}_3$  containing 8 mM  $\text{Cu}(\text{OTf})_2$  and 40 mM 1-dodecene).

**Table S7** Lewis acid promoted Pd(II)-catalyzed 1,5-cyclooctadiene isomerization under different conditions<sup>[a]</sup>

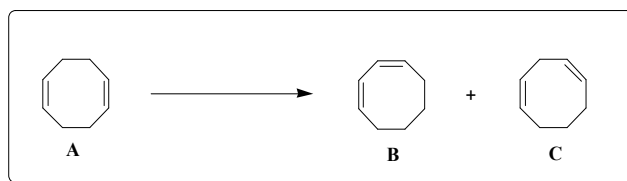

| Entries | Catalyst             | Lewis acid           | Time | Conv./% | Yield B /% | Yield C /% |
|---------|----------------------|----------------------|------|---------|------------|------------|
| 1       | Pd(OAc) <sub>2</sub> | -                    | 24 h | 0.9     | -          | -          |
| 2       | -                    | Sc(OTf) <sub>3</sub> | 24 h | 1.1     | -          | -          |
| 3       | -                    | Cu(OTf) <sub>2</sub> | 24 h | 1.0     | -          | -          |
| 4       | Pd(OAc) <sub>2</sub> | Sc(OTf) <sub>3</sub> | 24 h | 95.2    | 89.0       | 4.7        |
| 5       | Pd(OAc) <sub>2</sub> | Cu(OTf) <sub>2</sub> | 24 h | 93.0    | 88.0       | 4.1        |
| 6       | Pd(OAc) <sub>2</sub> | Al(OTf) <sub>3</sub> | 22 h | 91.6    | 87.3       | 3.4        |
| 7       | Pd(OAc) <sub>2</sub> | Mg(OTf) <sub>2</sub> | 22 h | 88.5    | 79.6       | 4.8        |
| 8       | Pd(OAc) <sub>2</sub> | Zn(OTf) <sub>2</sub> | 22 h | 89.1    | 80.0       | 6.5        |

[a] Reaction conditions: CH<sub>3</sub>CN (5 mL), Pd(OAc)<sub>2</sub> (4 mM), Lewis acid (8 mM), 1,5-cyclooctadiene (0.2 M), 90 °C.

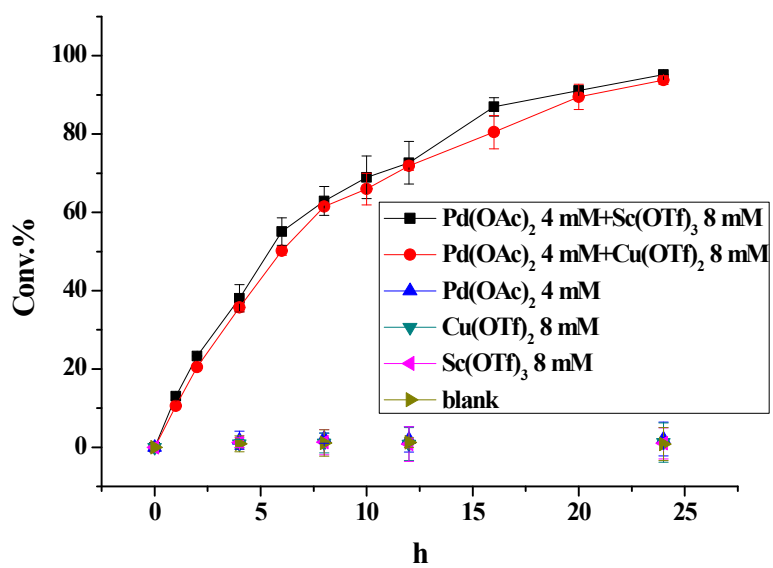

**Figure S10** Isomerization kinetics of 1,5-cyclooctadiene. Conditions: CH<sub>3</sub>CN (5 mL), Pd(OAc)<sub>2</sub> (4 mM), Lewis acid (8 mM), 1,5-cyclooctadiene (0.2 M), 90 °C.

**GC-MS data for catalytic oxidation of 1-octene by Pd(OAc)<sub>2</sub> plus Sc(OTf)<sub>3</sub>.**  
Conditions: CH<sub>3</sub>CN (5 mL), water (0.2 mL), Pd(OAc)<sub>2</sub> (0.02 mmol), Sc(OTf)<sub>3</sub> (0.04 mmol), 1-octene (2 mmol), O<sub>2</sub> (20 atm), temperature 80 °C, reaction time 12 h. The measurements were conducted with auto sampler, HP-5 capillary column and a flame ionization detector.

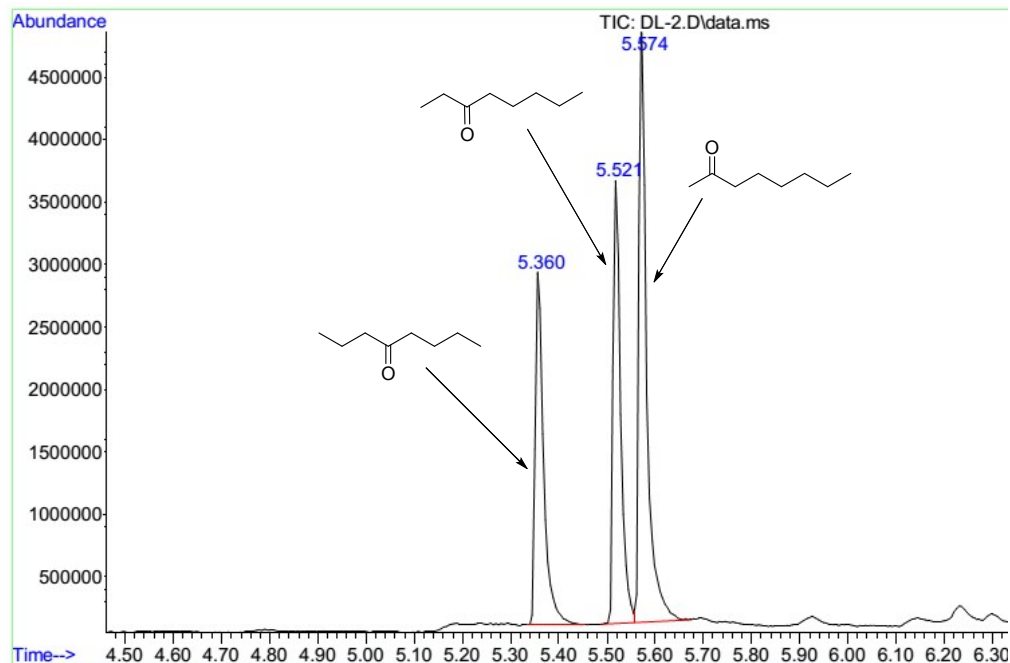

**Figure S11.** GC-MS graph of 1-octene oxidation by Pd(OAc)<sub>2</sub> plus Sc(OTf)<sub>3</sub>.

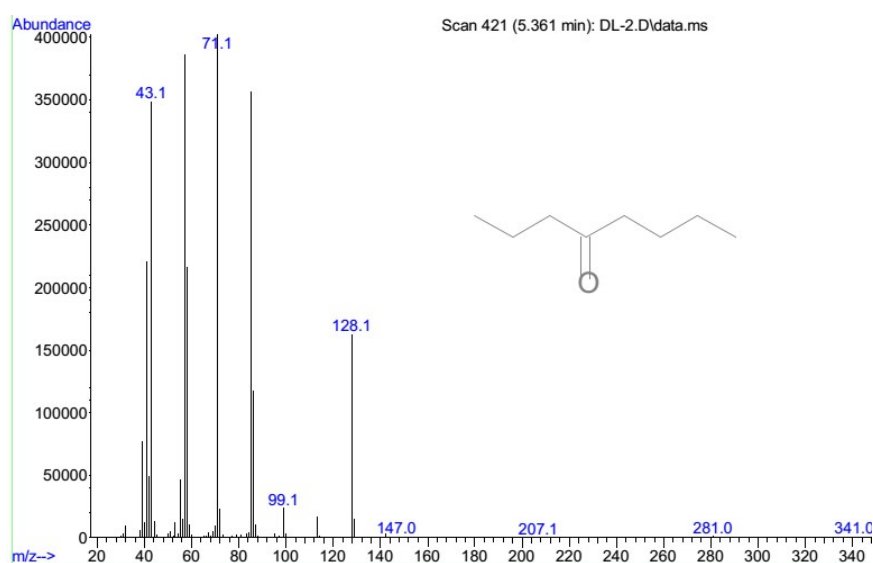

**Figure S11-1.** MS graph of 4-octanone in GC-MS analysis.

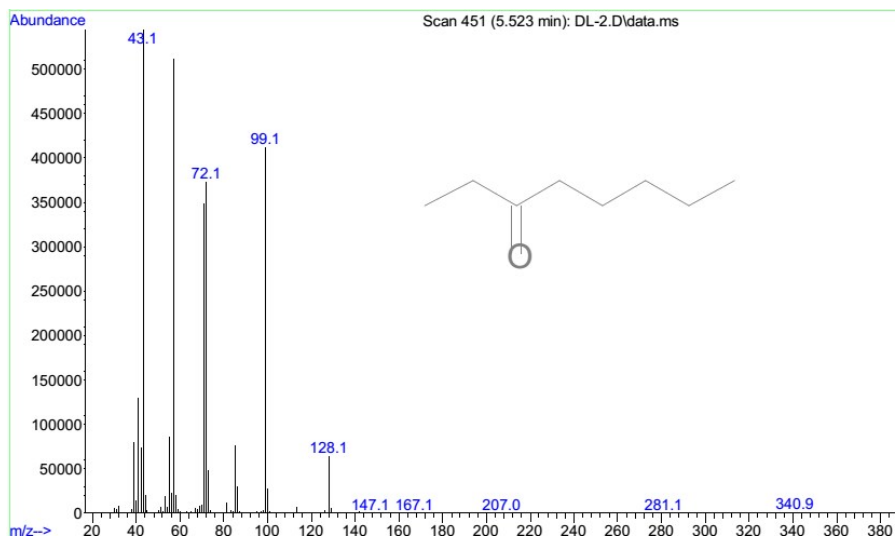

Figure S11-2. MS graph of 3-octanone in GC-MS analysis.

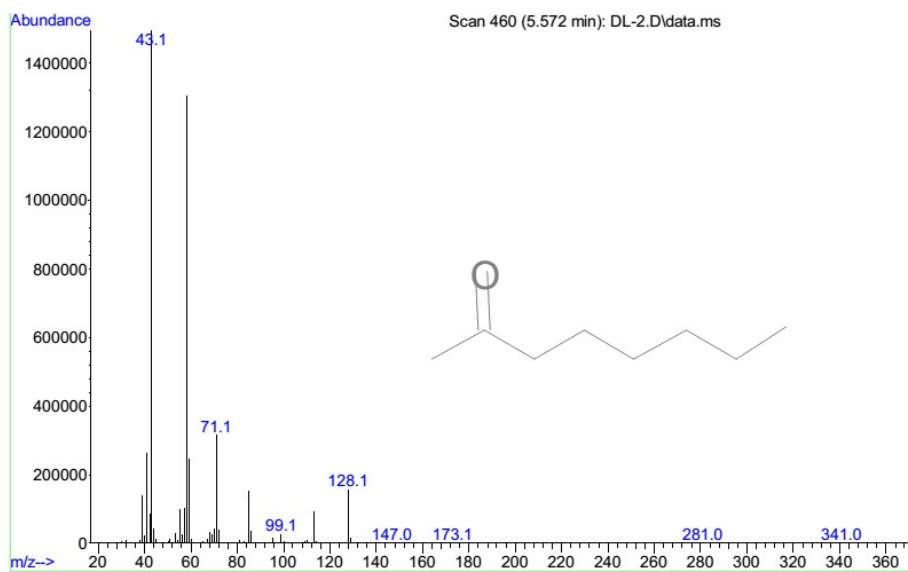

Figure S11-3. MS graph of 2-octanone in GC-MS analysis.

**GC-MS data for catalytic isomerization of 1,5-cyclooctadiene by Pd(OAc)<sub>2</sub> plus Sc(OTf)<sub>3</sub>.**  
Conditions: CH<sub>3</sub>CN (5 mL), Pd(OAc)<sub>2</sub> (0.02 mmol), Sc(OTf)<sub>3</sub> (0.04 mmol), 1,5-cyclooctadiene (1 mmol), temperature 90 °C; reaction time 24 h. The measurements were conducted with auto sampler, HP-5 capillary column and a flame ionization detector.

Vial Number: 8

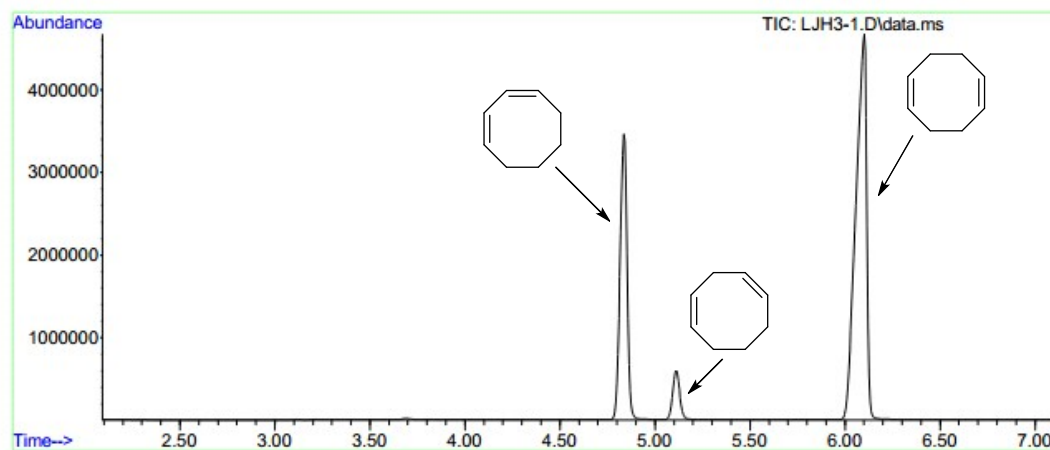

**Figure S12.** GC-MS graph of 1,5-cyclooctadiene isomerization by Pd(OAc)<sub>2</sub> plus Sc(OTf)<sub>3</sub>.

Library Searched : C:\Database\NIST11.L  
Quality : 96  
ID : 1,3-Cyclooctadiene, (Z,Z)-

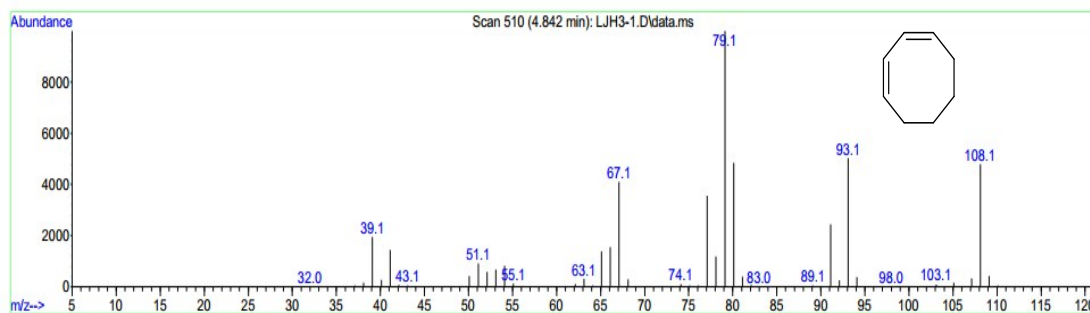

**Figure S12-1.** MS graph of 1,3-cyclooctadiene in GC-MS analysis.



Library Searched : C:\Database\NIST11.L  
Quality : 97  
ID : 1,4-Cyclooctadiene, (Z,Z)-

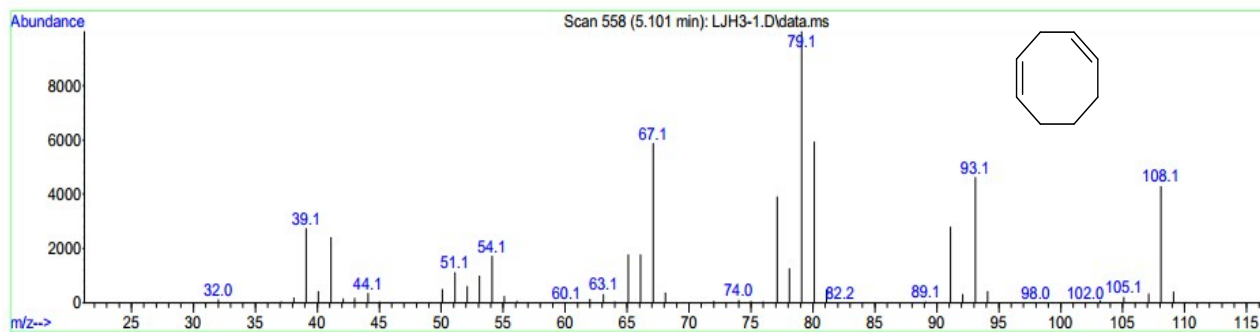

Figure S12-2. MS graph of 1,4-cyclooctadiene in GC-MS analysis.

Library Searched : C:\Database\NIST11.L  
Quality : 90  
ID : 1,5-Cyclooctadiene

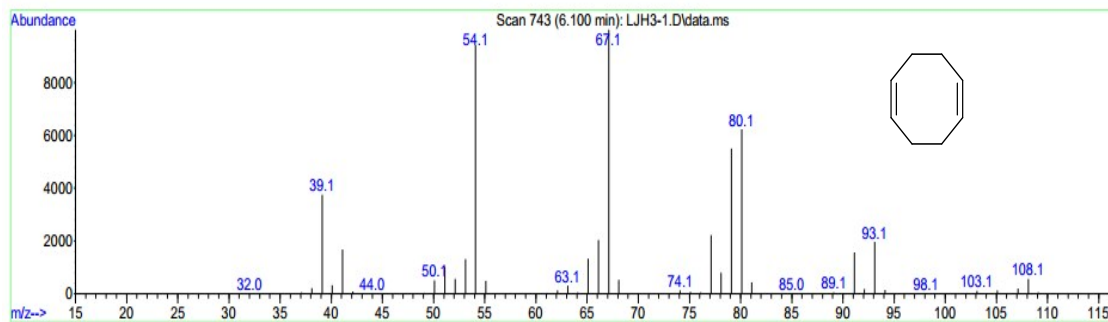

Figure S12-3. MS graph of 1,5-cyclooctadiene in GC-MS analysis.
